# Supplementary material for: A controllable perfusion microfluidic chip for facilitating the development of retinal ganglion cells in human retinal organoids
Source: Royal Society of Chemistry journal article supplement (doi:10.1039/d3lc00054k), 2023-01-01
Supplement: d3lc00054k1.pdf [file d3lc00054k1.pdf]

## Electronic Supplement Information

**Supplementary Table 1.** Model parameters for the oxygen transport and consumption at 37 °C.

| Parameters                                | Values                                                                              |
|-------------------------------------------|-------------------------------------------------------------------------------------|
| Henry's constant for oxygen               | $K_{H,O_2} = 1.32 \times 10^{-3} \text{ mol} \cdot \text{m}^{-3} \text{ mmHg}^{-1}$ |
| Oxygen partial pressure in the atmosphere | $p_{O_2} = 159 \text{ mmHg}$                                                        |
| Oxygen concentration for a fresh medium   | $c = 0.21 \text{ mol/m}^3$                                                          |
| Critical oxygen concentration             | $c_{cr} = 1.0 \times 10^{-4} \text{ mol/m}^3$                                       |
| Michaelis-Menten constant                 | $K_m = 0.66 \times 10^{-3} \text{ mol/m}^3$                                         |
| Maximum oxygen consumption rate           | $R_{max} = 2.0 \times 10^{-3} \text{ mol} \cdot \text{m}^{-3} \cdot \text{s}^{-1}$  |
| The diffusion constant of oxygen          | $D = 2.68 \times 10^{-9} \text{ m}^2/\text{s}$                                      |
| Flow rate                                 | $Q = 10, 15, 35, 50, 70 \text{ } \mu\text{l/h}$                                     |
| Fluid density                             | $\rho = 993 \text{ kg/m}^3$                                                         |
| Dynamic viscosity                         | $\eta = 0.7 \times 10^{-3} \text{ Pa} \cdot \text{s}$                               |
| Top fluidic layer height                  | $h_{top} = 100 \text{ } \mu\text{m}$                                                |
| Membrane height                           | $h_{memb} = 10 \text{ } \mu\text{m}$                                                |
| Bottom fluidic layer height               | $h_{bot} = 100, 200, 400, 600, 800 \text{ } \mu\text{m}$                            |
| Diameter of the cell spheroid             | $D_{cell} = 0.8 \text{ mm}$                                                         |
| The short shaft of ellipse microwell      | $a = 1 \text{ mm}$                                                                  |
| The long shaft of ellipse microwell       | $b = 1.25 \text{ mm}$                                                               |

**Supplementary Table 2.** The information of the primary antibodies.

| <b>Antigen</b>    | <b>Host</b> | <b>Source</b> | <b>Catalogue Number</b> | <b>IHC dilution</b> |
|-------------------|-------------|---------------|-------------------------|---------------------|
| Brn3a             | Rabbit      | Abcam         | ab245230                | 1:200               |
| Atoh7             | Rabbit      | NOVUS         | NBP1-88639              | 1:400               |
| ZO-1              | Rabbit      | Invitrogen    | 402200                  | 1:500               |
| Cleaved-caspase 3 | Rabbit      | CST           | #9661                   | 1:400               |
| CRX               | Mouse       | NOVUS         | H00001406-M02           | 1:400               |
| RX                | Mouse       | Santa Cruz    | sc-271889               | 1:50                |
| CHX10             | Mouse       | Santa Cruz    | sc-365519               | 1:50                |
| Tuj1              | Rabbit      | Abcam         | ab18207                 | 1:500               |
| Tuj1              | Mouse       | Abcam         | ab78078                 | 1:500               |
| Pax6              | Mouse       | Biologend     | 862002                  | 1:200               |
| Pax6              | Rabbit      | Abcam         | ab195045                | 1:500               |
| HuC/D             | Mouse       | Invitrogen    | A21272                  | 1:200               |
| HuC/D             | Rabbit      | Abcam         | ab184267                | 1:400               |
| Recoverin         | Rabbit      | Millipore     | AB5585                  | 1:400               |
| Ki67              | Rabbit      | Abcam         | ab66155                 | 1:500               |
| CCND1             | Rabbit      | ABclonal      | A19038                  | 1:500               |
| Phospho-Vimentin  | Mouse       | MBL           | D076-3                  | 1:500               |
| AP2 $\alpha$      | Rabbit      | CST           | #3215                   | 1:200               |
| Islet1            | Rabbit      | Abcam         | ab20670                 | 1:500               |
| RBPM5             | Rabbit      | Abcam         | ab152101                | 1:500               |

**Supplementary Table 3.** The information of Primers.

| <b>Name</b> | <b>Forward primer</b>   | <b>Reverse primer</b>   | <b>ID</b>      |
|-------------|-------------------------|-------------------------|----------------|
| KCNN1       | TCGGGGAAACCCTCAAATGTG   | CCATGACGACGATGCCAAAC    | NM_001386974.1 |
| KCNN2       | GGCGTCGCTGTATTCCTTAG    | TATTCTCCAGTCATCTGCTCCA  | XM_047417166.1 |
| KCNH1       | AGTGGCCCCCTCAAACACG     | CTATCTGAGCATTCCCCAACAC  | NM_002238.4    |
| KCNH6       | TCCGCTGCCTGGTAGATGT     | GGTCCTCGAAGTTGAGAATGAAC | NM_011525313.2 |
| KCNK1       | TTCTGGAAACCTTCTGTGAACTC | AGTTGGTCATGCTCTATGATGTG | NM_002245.4    |
| CRX         | GCCCCACTATTCTGTCAACG    | GTCTGGGTACTGGGTCTTGG    | NM_000554.6    |
| Recoverin   | GACGGTAACGGGACCATCAG    | GATCTTCTCGGCTCGCTTTT    | NM_002903.3    |
| Tuj1        | CAGCAAGGTGCGTGAGGAGTA   | TGCGGAAGCAGATGTCGTAGA   | NM_00119181.2  |
| GAPDH       | CCATGTTTCGTCATGGGTGTGA  | CATGAGTCCTCCACGATACCA   | NM_002046      |
| TRPV3       | TGGGCAGGTTCAACACGC      | CCTTCGTGTTGGTACTTGGGG   | NM_001258205.2 |
| LAMC3       | GCTCCGAGGAATGCACGTT     | TGTCATCGCACTGGAGGTGTA   | NM_006059.4    |
| COL6A1      | ACACCGACTGCGCTATCAAG    | CGGTCACCACAATCAGGTACTT  | NM_001848.3    |
| COL6A2      | TACGGAGAGTGCTACAAGGTG   | GGTCCTGGGAATCCAATGGG    | NM_058175.3    |

**A**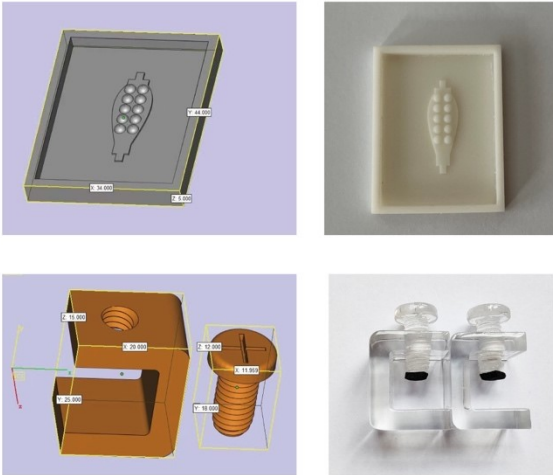**B**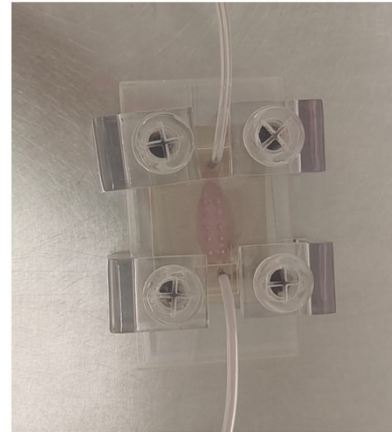

**Supplementary Fig. 1** 3D printing molds and images of the assembled CPMC device. (A) 3D printed molds of microwells and U clamps. (B) Experiment setup for culturing ROs in a microfluidic chip.

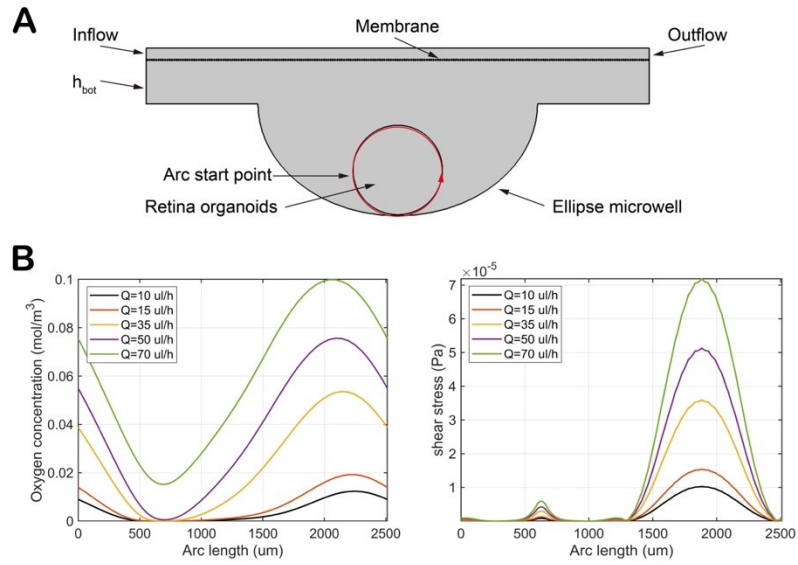

**Supplementary Fig. 2** Simulation of oxygen in the simplified version of the microfluidic chip with different flow rates. (A) The geometrical conditions of the simulated microfluidic chip. The path along the cell spheroid surface is marked in red. (B) Distribution profiles of the oxygen concentration and FSS along the path marked in red under different flow rates ( $Q = 10, 15, 35, 50, 70 \mu\text{l/h}$ ) after steady-state conditions have been reached. For this simulation, the bottom channel height is fixed at  $h_{bot} = 400 \mu\text{m}$ .

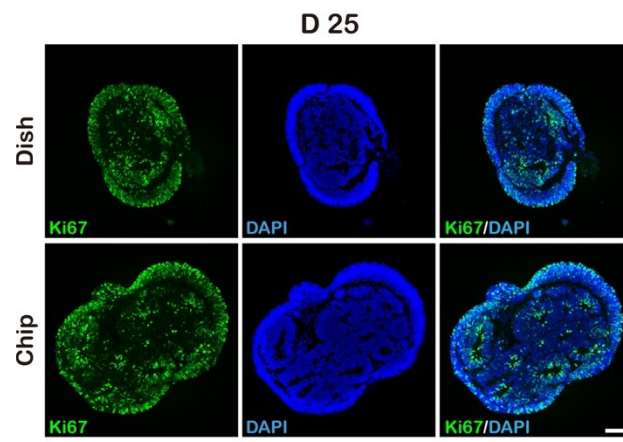

**Supplementary Fig. 3** Representative images for Ki67<sup>+</sup> proliferative cells in the central rosette-like structure of the whole ROs. Scale bars, 100  $\mu$ m.

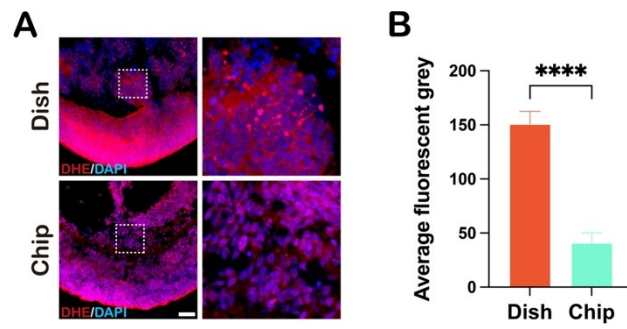

**Supplementary Fig. 4** The expression of DHE in the interior of ROs. A. Representative images of DHE staining in the NRs of the ROs. The white dotted line shows the 5X magnification of the original images. Scale bar, 50  $\mu$ m. B. Quantitation analysis of the average fluorescent grey of DHE in the interior of ROs. Data are mean  $\pm$  SEM.  $n = 3$ , three independent experiments. \*\*\*\* $p < 0.0001$ .

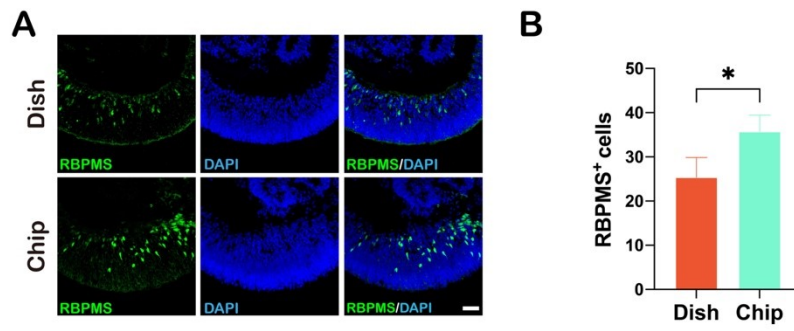

**Supplementary Fig. 5** The expression of RBPMS<sup>+</sup> cells in the NRs at day 39. (A) Representative images of RBPMS<sup>+</sup> cells in the NRs. Scale bars, 50  $\mu$ m. (B) Quantitation analysis for the number of RBPMS<sup>+</sup> cells in the NRs. Data are mean  $\pm$  SEM.  $n = 3$ , three independent experiments. \* $p < 0.05$ .



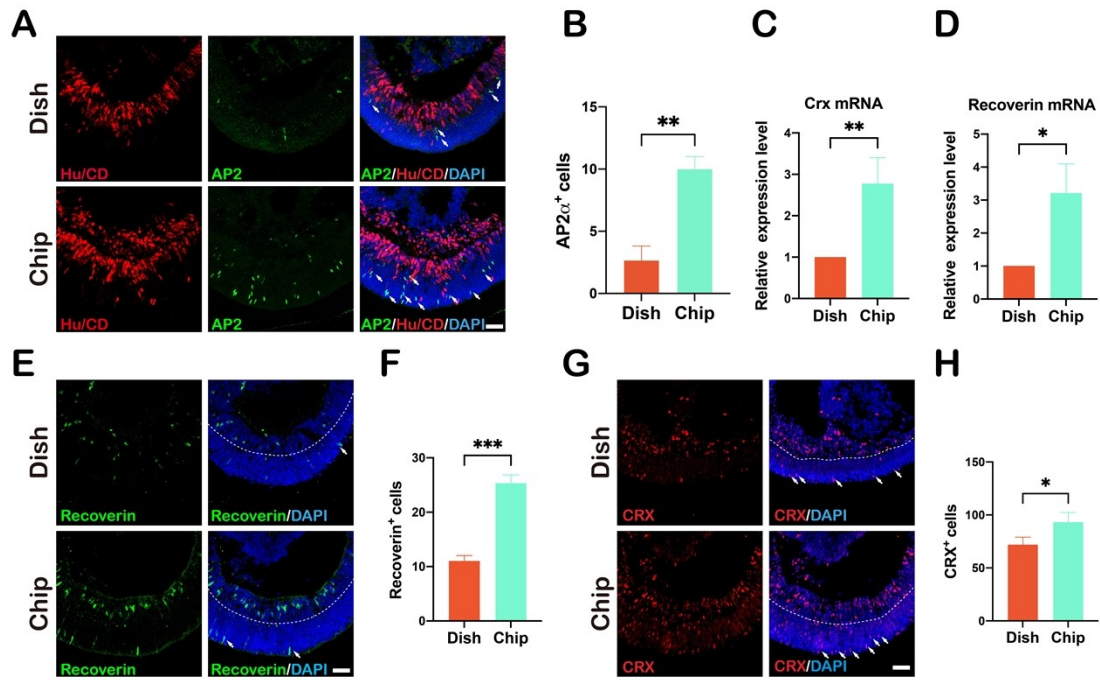

**Supplementary Fig. 6** Development of amacrine cells and photoreceptors under perfused conditions. (A) Representative images of HuC/D/AP2 $\alpha$  cells in the NRs at day 39. Scale bar, 50  $\mu$ m. (B) Quantitation analysis for the number of AP2 $\alpha$  cells in the NRs. Data are mean  $\pm$  SEM.  $n = 3$ , three independent experiments.  $**p < 0.05$ . (C-D) Quantitation analysis for the mRNA levels of CRX and Recoverin in the ROs. Data are mean  $\pm$  SEM.  $n = 3$ , three independent experiments.  $*p < 0.05$ ,  $**p < 0.01$ . (E) Representative images of Recoverin $^+$  cells in the NRs at day 39. White arrows indicate the migration of Recoverin $^+$  cells to the apical side of the NRs. Scale bars, 50  $\mu$ m. (F) Quantitation analysis for the number of Recoverin $^+$  cells in the NRs. Data are mean  $\pm$  SEM.  $n = 3$ , three independent experiments.  $***p < 0.001$ . (G) Representative images of CRX $^+$  cells in the NRs at day 39. White arrows indicate the migration of CRX $^+$  cells to the apical side of the NRs. Scale bar, 50  $\mu$ m. (H) Quantitation analysis for the number of CRX $^+$  cells in the NRs. Data are mean  $\pm$  SEM.  $n = 3$ , three independent experiments.  $*p < 0.05$ .

**A**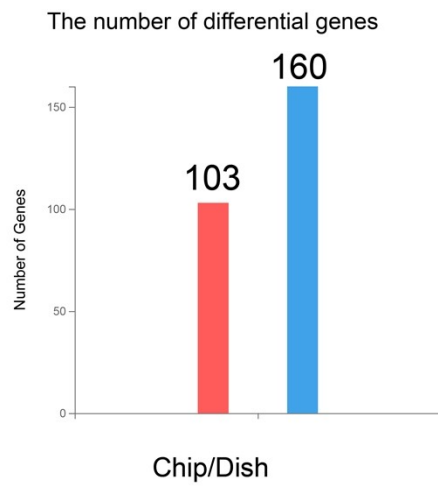**B**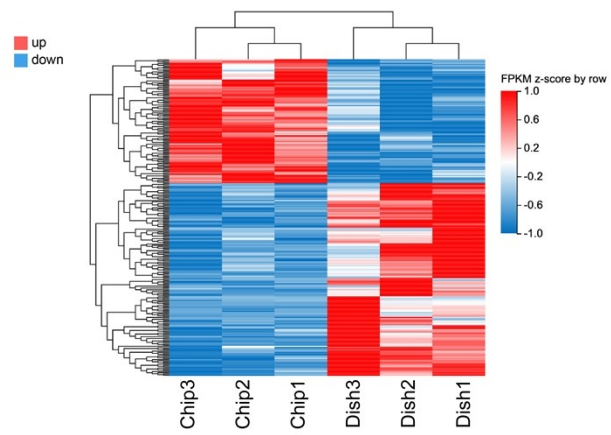

**Supplementary Fig. 7** The number of DEGs and cluster heat map of 39-day ROs in the dish and chip group. (A) The number of DEGs with 103 upregulation genes and 160 downregulation genes. (B) Cluster heat map of ROs in dish and chip group.  $n = 10$ , three independent experiments.

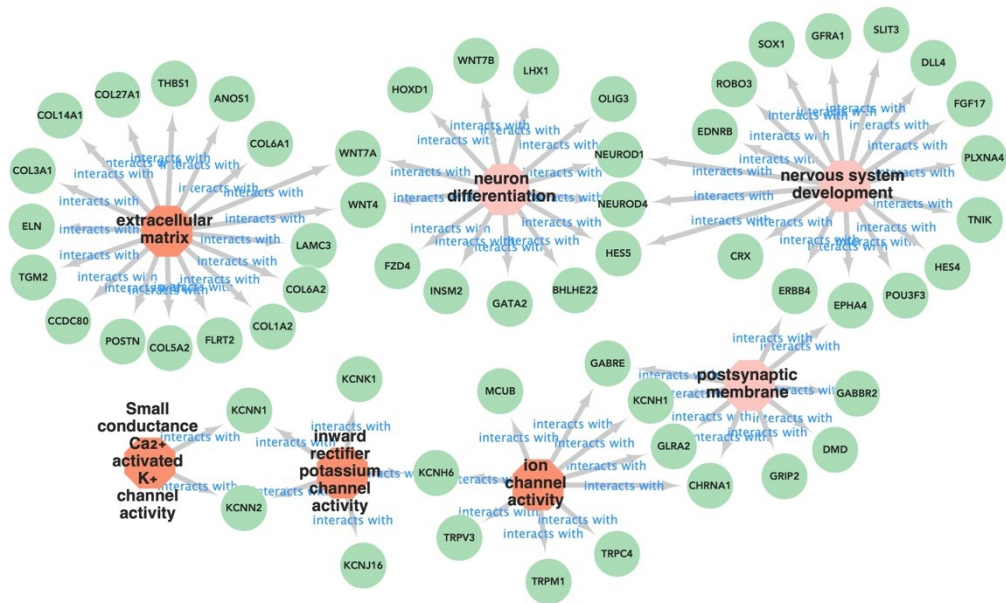

**Supplementary Fig. 8** Cytoscape online software analyzed the gene-pathway interaction network between ion channels, ECM, and nervous system development.
